# Supplementary material for: Assessing Sensory Characteristics and Consumer Preference of Legume-Cereal-Root Based Porridges in Nandi County
Source: Hindawi journal article supplement (doi:10.1155/2019/3035418), 2019-06-18
Supplement: f1 [file 3035418.f1.pdf]

[illegible]



[illegible]

**Supplementary Material 2.**

**Demographic Characteristics of Respondents**

| Name of the Group         |           |         | Type of Porridge   |           |         | Sex of Respondent |           |         |
|---------------------------|-----------|---------|--------------------|-----------|---------|-------------------|-----------|---------|
|                           | Frequency | Percent |                    | Frequency | Percent |                   | Frequency | Percent |
| Kiptaruswo                | 89        | 59.7    | Family             | 44        | 29.9    | Female            | 103       | 69.1    |
| Kapkerel                  | 60        | 40.3    | School children    | 105       | 70.5    | Male              | 46        | 30.9    |
| Total                     | 149       | 100.0   | Total              | 149       | 100     | Total             | 149       | 100     |
| Level of Education        |           |         | Age of respondents |           |         |                   |           |         |
| Primary school dropout    | 12        | 8.1     | 11 to 20           | 115       | 77.2    |                   |           |         |
| primary continuing        | 106       | 71.1    | 21-30              | 6         | 4.0     |                   |           |         |
| Completed primary         | 3         | 2.0     | 31-40              | 11        | 7.4     |                   |           |         |
| Continuing secondary      | 10        | 6.7     | 41-50              | 7         | 4.7     |                   |           |         |
| Completed secondary       | 8         | 5.4     | 51-60              | 7         | 4.7     |                   |           |         |
| secondary school drop out | 2         | 1.3     | >60                | 3         | 2.0     |                   |           |         |
| tertiary level            | 8         | 5.4     | Total              | 149       | 100.0   |                   |           |         |
| Total                     | 149       | 100.0   |                    |           |         |                   |           |         |

Supplementary Material 3:

RANKING (%) OF PORRIDGES' SENSORY ATTRIBUTES

| Sensory Attributes<br>Ranking (%)     | Color |          |       | Smell |          |       | Taste |          |       | Texture |          |       | Viscosity |          |       | Acceptance |          |       |
|---------------------------------------|-------|----------|-------|-------|----------|-------|-------|----------|-------|---------|----------|-------|-----------|----------|-------|------------|----------|-------|
|                                       | Most  | Moderate | Least | Most  | Moderate | Least | Most  | Moderate | Least | Most    | Moderate | Least | Most      | Moderate | Least | Most       | Moderate | Least |
| <b>Kapkerer's Children Porridge</b>   |       |          |       |       |          |       |       |          |       |         |          |       |           |          |       |            |          |       |
| B: Initial formulation                | 20    | 42.5     | 37.5  | 27.5  | 20       | 52.5  | 22.5  | 30       | 47.5  | 25      | 20       | 55    | 35        | 20       | 45    | 25         | 27.5     | 47.5  |
| E: New formulation                    | 40    | 20       | 40    | 45    | 37.5     | 17.5  | 47.5  | 37.5     | 15    | 32.5    | 52.5     | 15    | 45        | 42.5     | 12.5  | 47.5       | 40       | 12.5  |
| F: New Formulation                    | 40    | 37.5     | 22.5  | 27.5  | 42.5     | 30    | 30    | 32.5     | 37.5  | 42.5    | 27.5     | 30    | 20        | 37.5     | 42.5  | 27.5       | 32.5     | 40    |
| <b>Kiptaruswo's Children Porridge</b> |       |          |       |       |          |       |       |          |       |         |          |       |           |          |       |            |          |       |
| A: Initial Formulation                | 10.8  | 10.8     | 78.5  | 13.8  | 15.4     | 70.8  | 18.5  | 13.8     | 67.7  | 12.3    | 9.2      | 78.5  | 35.4      | 9.2      | 55.3  | 16.9       | 12.3     | 70.3  |
| C: New Formulation                    | 44.6  | 38.5     | 16.9  | 33.8  | 44.6     | 21.5  | 40    | 40       | 20    | 47.7    | 40       | 12.3  | 29.2      | 44.6     | 26.2  | 46.2       | 35.4     | 18.9  |
| D: New Formulation                    | 44.6  | 50.7     | 4.6   | 52.4  | 40       | 7.7   | 41.5  | 46.2     | 12.3  | 40      | 50.8     | 9.2   | 35.4      | 46.2     | 18.5  | 36.9       | 52.3     | 10.8  |
| <b>Kapkerer's Family Porridge</b>     |       |          |       |       |          |       |       |          |       |         |          |       |           |          |       |            |          |       |
| B: Initial formulation                | 60    | 10       | 30    | 35    | 20       | 45    | 30    | 10       | 60    | 55      | 10       | 30    | 25        | 15       | 60    | 30         | 20       | 50    |
| I: new Formulation                    | 20    | 35       | 45    | 40    | 30       | 30    | 45    | 30       | 25    | 30      | 30       | 45    | 40        | 35       | 25    | 35         | 35       | 30    |
| J: New Formulation                    | 20    | 55       | 25    | 25    | 50       | 25    | 25    | 60       | 15    | 15      | 60       | 25    | 35        | 50       | 15    | 35         | 45       | 20    |
| <b>Kiptaruswo's Family Porridge</b>   |       |          |       |       |          |       |       |          |       |         |          |       |           |          |       |            |          |       |
| A: Initial formulation                | 12.5  | 8.3      | 79.2  | 8.3   | 20.8     | 70.8  | 8.3   | 12.5     | 79.2  | 4.2     | 29.2     | 66.7  | 16.7      | 12.5     | 75    | 8.3        | 25       | 66.7  |
| G: New Formulation                    | 33.3  | 58.3     | 8.3   | 41.7  | 45.8     | 12.5  | 45.8  | 45.8     | 8.3   | 37.5    | 50       | 12.5  | 37.5      | 41.7     | 16.7  | 37.5       | 45.8     | 20.8  |
| H: New Formulation                    | 54.2  | 33.3     | 12.5  | 40    | 33.3     | 16.7  | 45.8  | 41.7     | 12.5  | 58.3    | 20.8     | 20.8  | 45.8      | 45.8     | 8.3   | 54.2       | 29.2     | 12.5  |

## Supplementary Material 4

### Reasons for Liking/ Disliking a Porridge and Most Valued Characteristic of Porridge

|              | Reasons for Liking Porridge |            | Reasons for Disliking Porridge |            | Most valued Attributes |              |
|--------------|-----------------------------|------------|--------------------------------|------------|------------------------|--------------|
|              | Frequency                   | Percentage | Frequency                      | Percentage | Frequency              | Percentage   |
| Nutrition    |                             |            |                                |            | 4                      | 2.7          |
| Color        | 16                          | 10.7       | 18                             | 12.1       | 8                      | 5.4          |
| Taste        | 58                          | 38.9       | 40                             | 26.8       | 118                    | 79.2         |
| Smell        | 21                          | 14.1       | 14                             | 9.4        | 13                     | 8.7          |
| Texture      | 28                          | 18.8       | 48                             | 32.2       | 4                      | 2.7          |
| Viscosity    | 26                          | 17.4       | 29                             | 19.5       | 2                      | 1.3          |
| <b>Total</b> | <b>149</b>                  | <b>100</b> | <b>149</b>                     | <b>100</b> | <b>149</b>             | <b>100.0</b> |

Supplementary material 5: Correlation between Most Acceptable Porridge and Most Liked Sensory Attributes

Table 1: Kiptaruswo’s Children Porridge

|                                      |                     | Correlations                |                                  |                                  |                                  |                                    |                                      |
|--------------------------------------|---------------------|-----------------------------|----------------------------------|----------------------------------|----------------------------------|------------------------------------|--------------------------------------|
|                                      |                     | Kipchildren most acceptable | Kipchildren most preferred color | Kipchildren most preferred smell | Kipchildren most preferred taste | Kipchildren most preferred texture | Kipchildren most preferred viscosity |
| Kipchildren most acceptable          | Pearson Correlation | 1                           | .414**                           | .730**                           | .560**                           | .502**                             | .440**                               |
|                                      | Sig. (2-tailed)     |                             | .001                             | .000                             | .000                             | .000                               | .000                                 |
|                                      | N                   | 65                          | 65                               | 65                               | 65                               | 65                                 | 65                                   |
| Kipchildren most preferred color     | Pearson Correlation | .414**                      | 1                                | .406**                           | .343**                           | .032                               | .331**                               |
|                                      | Sig. (2-tailed)     | .001                        |                                  | .001                             | .005                             | .803                               | .007                                 |
|                                      | N                   | 65                          | 65                               | 65                               | 65                               | 65                                 | 65                                   |
| Kipchildren most preferred smell     | Pearson Correlation | .730**                      | .406**                           | 1                                | .587**                           | .292*                              | .332**                               |
|                                      | Sig. (2-tailed)     | .000                        | .001                             |                                  | .000                             | .018                               | .007                                 |
|                                      | N                   | 65                          | 65                               | 65                               | 65                               | 65                                 | 65                                   |
| Kipchildren most preferred taste     | Pearson Correlation | .560**                      | .343**                           | .587**                           | 1                                | .213                               | .371**                               |
|                                      | Sig. (2-tailed)     | .000                        | .005                             | .000                             |                                  | .088                               | .002                                 |
|                                      | N                   | 65                          | 65                               | 65                               | 65                               | 65                                 | 65                                   |
| Kipchildren most preferred texture   | Pearson Correlation | .502**                      | .032                             | .292*                            | .213                             | 1                                  | .246*                                |
|                                      | Sig. (2-tailed)     | .000                        | .803                             | .018                             | .088                             |                                    | .048                                 |
|                                      | N                   | 65                          | 65                               | 65                               | 65                               | 65                                 | 65                                   |
| Kipchildren most preferred viscosity | Pearson Correlation | .440**                      | .331**                           | .332**                           | .371**                           | .246*                              | 1                                    |
|                                      | Sig. (2-tailed)     | .000                        | .007                             | .007                             | .002                             | .048                               |                                      |
|                                      | N                   | 65                          | 65                               | 65                               | 65                               | 65                                 | 65                                   |

\*\* . Correlation is significant at the 0.01 level (2-tailed).

\* . Correlation is significant at the 0.05 level (2-tailed).



Table 2: Kapkerer’s Children Porridge

|                                      |                     | Correlations                     |                                  |                                  |                                    |                                      |                             |
|--------------------------------------|---------------------|----------------------------------|----------------------------------|----------------------------------|------------------------------------|--------------------------------------|-----------------------------|
|                                      |                     | Kapchildren most preferred color | Kapchildren most preferred smell | Kapchildren most preferred taste | Kapchildren most preferred texture | Kapchildren most preferred viscosity | Kapchildren most acceptable |
| Kapchildren most preferred color     | Pearson Correlation | 1                                | .270                             | .389*                            | .400*                              | .285                                 | .498**                      |
|                                      | Sig. (2-tailed)     |                                  | .092                             | .013                             | .011                               | .074                                 | .001                        |
|                                      | N                   | 40                               | 40                               | 40                               | 40                                 | 40                                   | 40                          |
| Kapchildren most preferred smell     | Pearson Correlation | .270                             | 1                                | .515**                           | .420**                             | .232                                 | .419**                      |
|                                      | Sig. (2-tailed)     | .092                             |                                  | .001                             | .007                               | .150                                 | .007                        |
|                                      | N                   | 40                               | 40                               | 40                               | 40                                 | 40                                   | 40                          |
| Kapchildren most preferred taste     | Pearson Correlation | .389*                            | .515**                           | 1                                | .453**                             | .213                                 | .571**                      |
|                                      | Sig. (2-tailed)     | .013                             | .001                             |                                  | .003                               | .188                                 | .000                        |
|                                      | N                   | 40                               | 40                               | 40                               | 40                                 | 40                                   | 40                          |
| Kapchildren most preferred texture   | Pearson Correlation | .400*                            | .420**                           | .453**                           | 1                                  | .217                                 | .681**                      |
|                                      | Sig. (2-tailed)     | .011                             | .007                             | .003                             |                                    | .180                                 | .000                        |
|                                      | N                   | 40                               | 40                               | 40                               | 40                                 | 40                                   | 40                          |
| Kapchildren most preferred viscosity | Pearson Correlation | .285                             | .232                             | .213                             | .217                               | 1                                    | .245                        |
|                                      | Sig. (2-tailed)     | .074                             | .150                             | .188                             | .180                               |                                      | .128                        |
|                                      | N                   | 40                               | 40                               | 40                               | 40                                 | 40                                   | 40                          |
| Kapchildren most acceptable          | Pearson Correlation | .498**                           | .419**                           | .571**                           | .681**                             | .245                                 | 1                           |
|                                      | Sig. (2-tailed)     | .001                             | .007                             | .000                             | .000                               | .128                                 |                             |
|                                      | N                   | 40                               | 40                               | 40                               | 40                                 | 40                                   | 40                          |

\*. Correlation is significant at the 0.05 level (2-tailed).

\*\*. Correlation is significant at the 0.01 level (2-tailed).

Table 3: Kapkerer's Family Porridge

|                                 |                     | Correlations           |                             |                             |                             |                               |                                 |
|---------------------------------|---------------------|------------------------|-----------------------------|-----------------------------|-----------------------------|-------------------------------|---------------------------------|
|                                 |                     | kapfam most acceptable | Kapfam most preferred color | Kapfam most preferred smell | kapfam most preferred taste | kapfam most preferred texture | kapfam most preferred viscosity |
| kapfam most acceptable          | Pearson Correlation | 1                      | .031                        | .413                        | .508*                       | .203                          | .235                            |
|                                 | Sig. (2-tailed)     |                        | .897                        | .071                        | .022                        | .391                          | .319                            |
|                                 | N                   | 20                     | 20                          | 20                          | 20                          | 20                            | 20                              |
| Kapfam most preferred color     | Pearson Correlation | .031                   | 1                           | -.228                       | .135                        | -.102                         | .472*                           |
|                                 | Sig. (2-tailed)     | .897                   |                             | .334                        | .570                        | .669                          | .036                            |
|                                 | N                   | 20                     | 20                          | 20                          | 20                          | 20                            | 20                              |
| Kapfam most preferred smell     | Pearson Correlation | .413                   | -.228                       | 1                           | .255                        | .018                          | .271                            |
|                                 | Sig. (2-tailed)     | .071                   | .334                        |                             | .278                        | .941                          | .247                            |
|                                 | N                   | 20                     | 20                          | 20                          | 20                          | 20                            | 20                              |
| kapfam most preferred taste     | Pearson Correlation | .508*                  | .135                        | .255                        | 1                           | .147                          | .185                            |
|                                 | Sig. (2-tailed)     | .022                   | .570                        | .278                        |                             | .536                          | .436                            |
|                                 | N                   | 20                     | 20                          | 20                          | 20                          | 20                            | 20                              |
| kapfam most preferred texture   | Pearson Correlation | .203                   | -.102                       | .018                        | .147                        | 1                             | -.018                           |
|                                 | Sig. (2-tailed)     | .391                   | .669                        | .941                        | .536                        |                               | .941                            |
|                                 | N                   | 20                     | 20                          | 20                          | 20                          | 20                            | 20                              |
| kapfam most preferred viscosity | Pearson Correlation | .235                   | .472*                       | .271                        | .185                        | -.018                         | 1                               |
|                                 | Sig. (2-tailed)     | .319                   | .036                        | .247                        | .436                        | .941                          |                                 |
|                                 | N                   | 20                     | 20                          | 20                          | 20                          | 20                            | 20                              |

\*. Correlation is significant at the 0.05 level (2-tailed).

**Table 4: Kiptaruswo’s Family Porridge**

|                                 |                     | kipfam most acceptable | Kipfam most preferred color | Kipfam most preferred smell | kipfam most preferred taste | kipfam most preferred texture | kipfam most preferred viscosity |
|---------------------------------|---------------------|------------------------|-----------------------------|-----------------------------|-----------------------------|-------------------------------|---------------------------------|
| kipfam most acceptable          | Pearson Correlation | 1                      | .775**                      | .851**                      | .702**                      | .342                          | .598**                          |
|                                 | Sig. (2-tailed)     |                        | .000                        | .000                        | .000                        | .102                          | .002                            |
|                                 | N                   | 24                     | 24                          | 24                          | 24                          | 24                            | 24                              |
| Kipfam most preferred color     | Pearson Correlation | .775**                 | 1                           | .633**                      | .679**                      | .266                          | .411*                           |
|                                 | Sig. (2-tailed)     | .000                   |                             | .001                        | .000                        | .209                          | .046                            |
|                                 | N                   | 24                     | 24                          | 24                          | 24                          | 24                            | 24                              |
| Kipfam most preferred smell     | Pearson Correlation | .851**                 | .633**                      | 1                           | .437*                       | .292                          | .450*                           |
|                                 | Sig. (2-tailed)     | .000                   | .001                        |                             | .033                        | .166                          | .027                            |
|                                 | N                   | 24                     | 24                          | 24                          | 24                          | 24                            | 24                              |
| kipfam most preferred taste     | Pearson Correlation | .702**                 | .679**                      | .437*                       | 1                           | .129                          | .392                            |
|                                 | Sig. (2-tailed)     | .000                   | .000                        | .033                        |                             | .549                          | .058                            |
|                                 | N                   | 24                     | 24                          | 24                          | 24                          | 24                            | 24                              |
| kipfam most preferred texture   | Pearson Correlation | .342                   | .266                        | .292                        | .129                        | 1                             | .021                            |
|                                 | Sig. (2-tailed)     | .102                   | .209                        | .166                        | .549                        |                               | .924                            |
|                                 | N                   | 24                     | 24                          | 24                          | 24                          | 24                            | 24                              |
| kipfam most preferred viscosity | Pearson Correlation | .598**                 | .411*                       | .450*                       | .392                        | .021                          | 1                               |
|                                 | Sig. (2-tailed)     | .002                   | .046                        | .027                        | .058                        | .924                          |                                 |
|                                 | N                   | 24                     | 24                          | 24                          | 24                          | 24                            | 24                              |

\*\* . Correlation is significant at the 0.01 level (2-tailed).

\* . Correlation is significant at the 0.05 level (2-tailed).
